# Supplementary figures and images for: Molecular Characterisation of Cryptosporidium spp. in Mozambican Children Younger than 5 Years Enrolled in a Matched Case-Control Study on the Aetiology of Diarrhoeal Disease
Source: MDPI journal article supplement (doi:10.3390/pathogens10040452), 2021-04-09

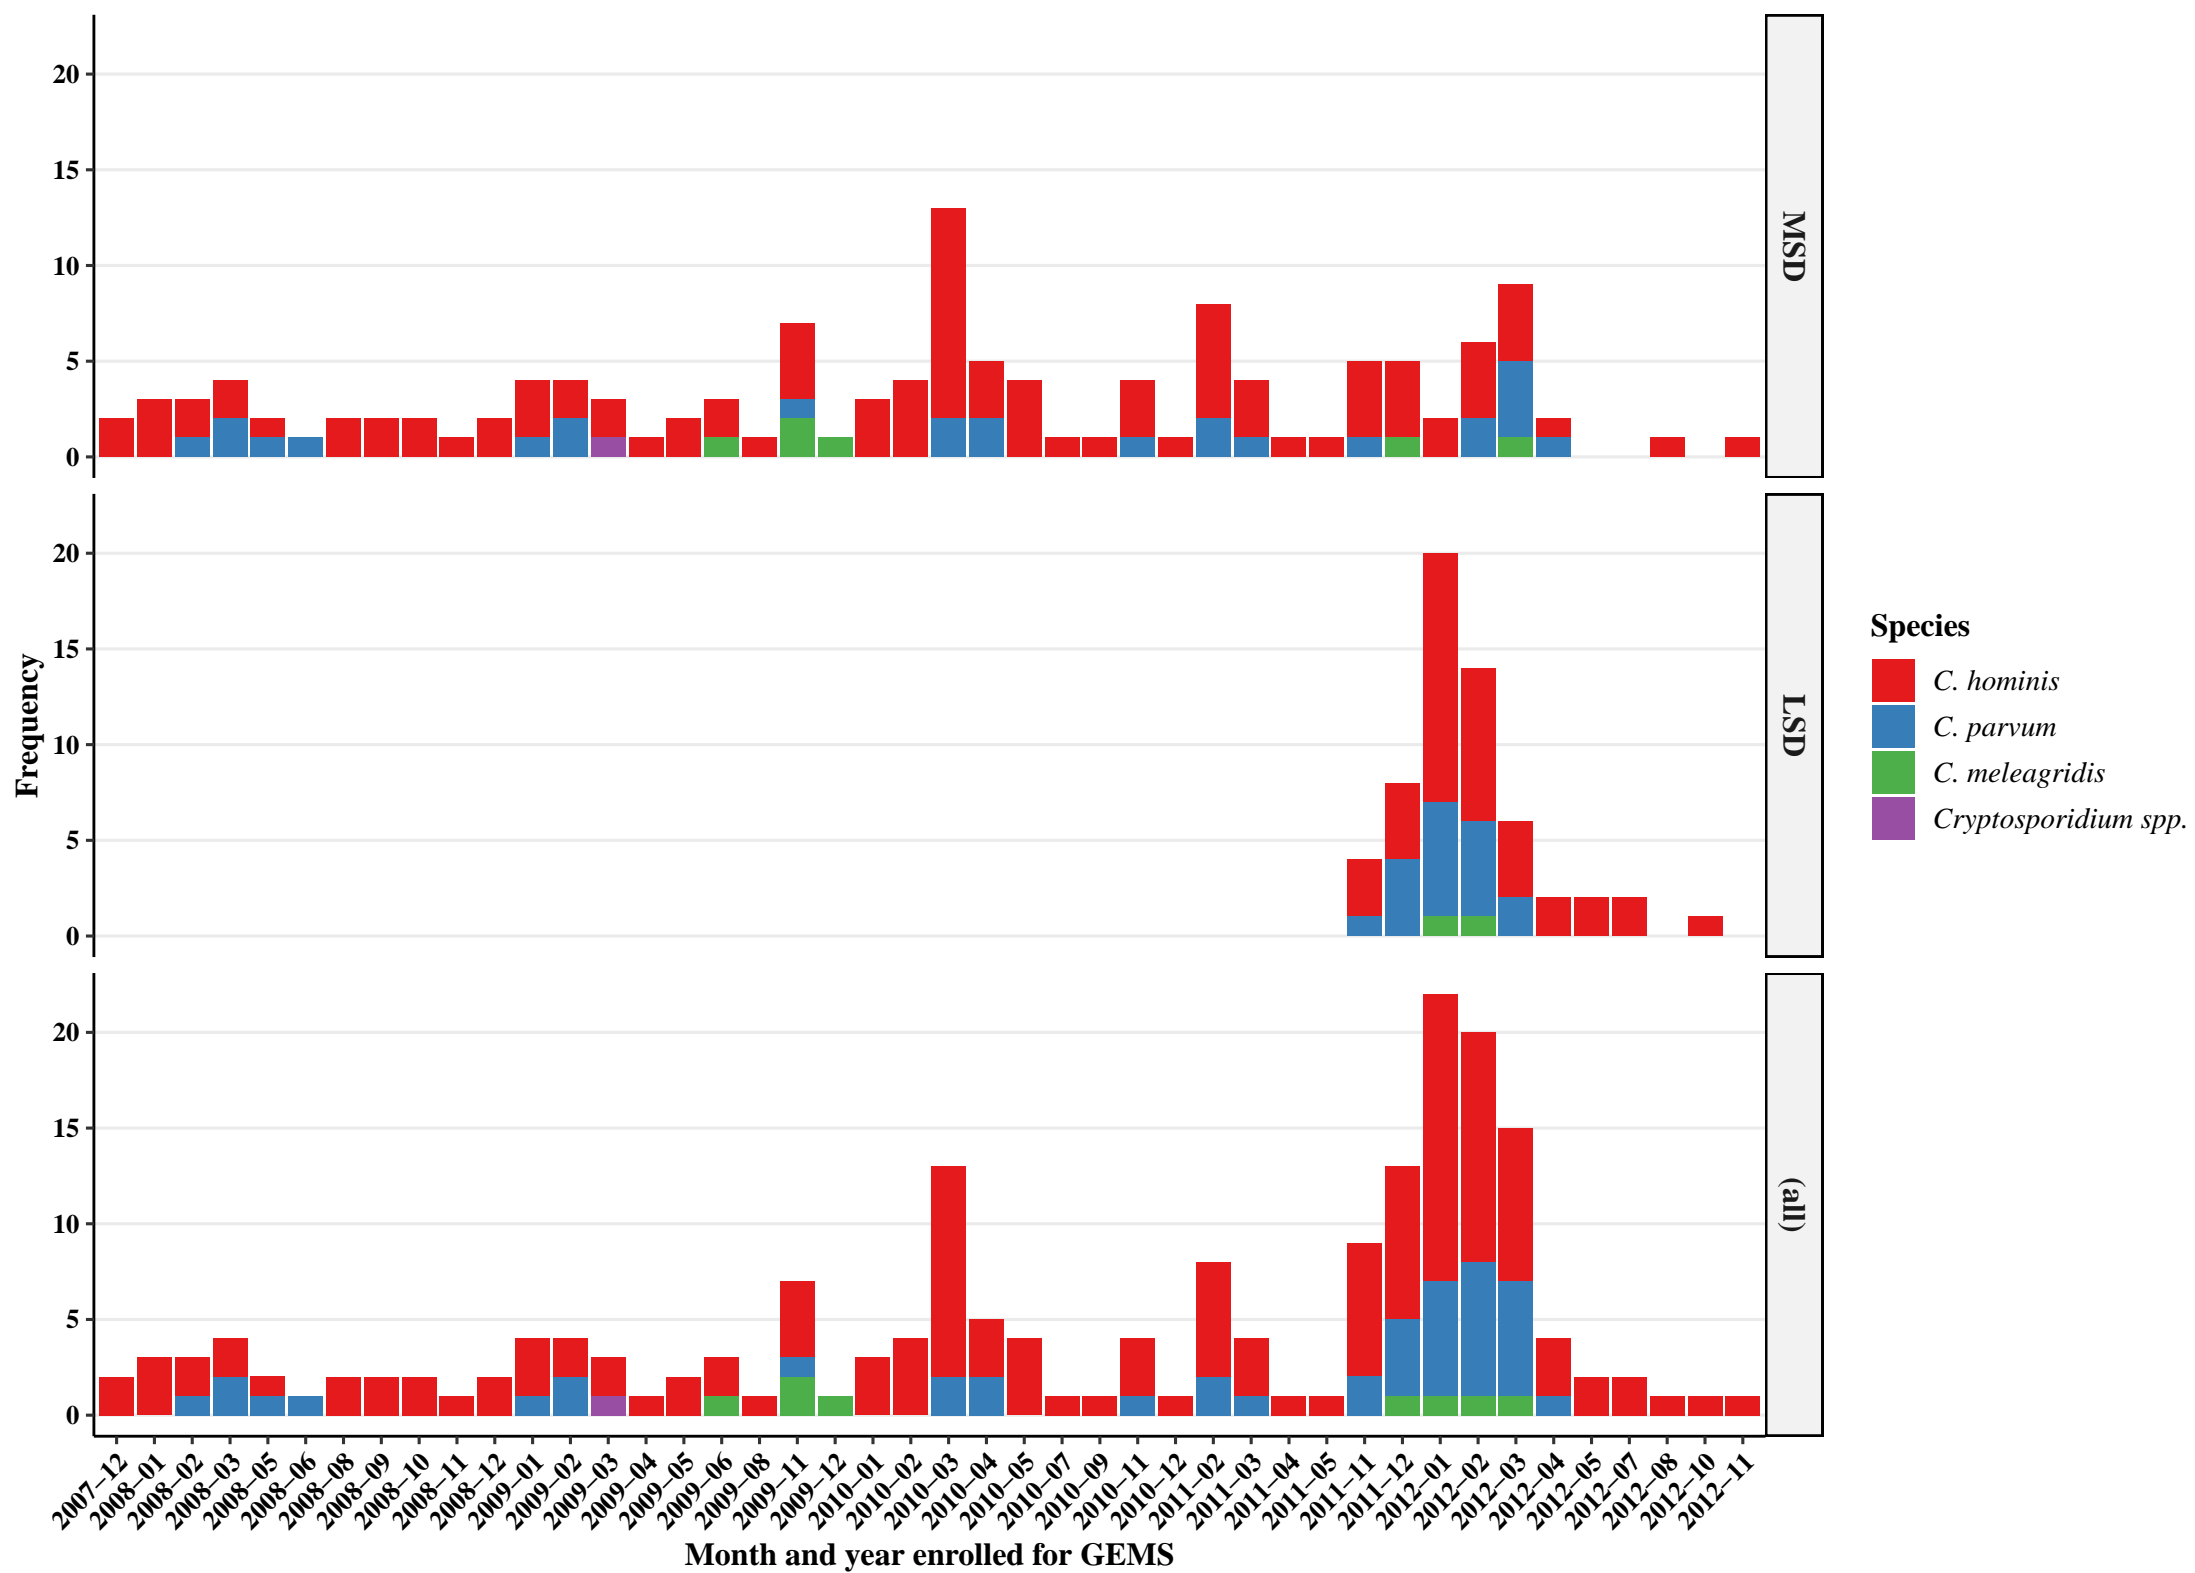

Supplement: s1 [file s1]

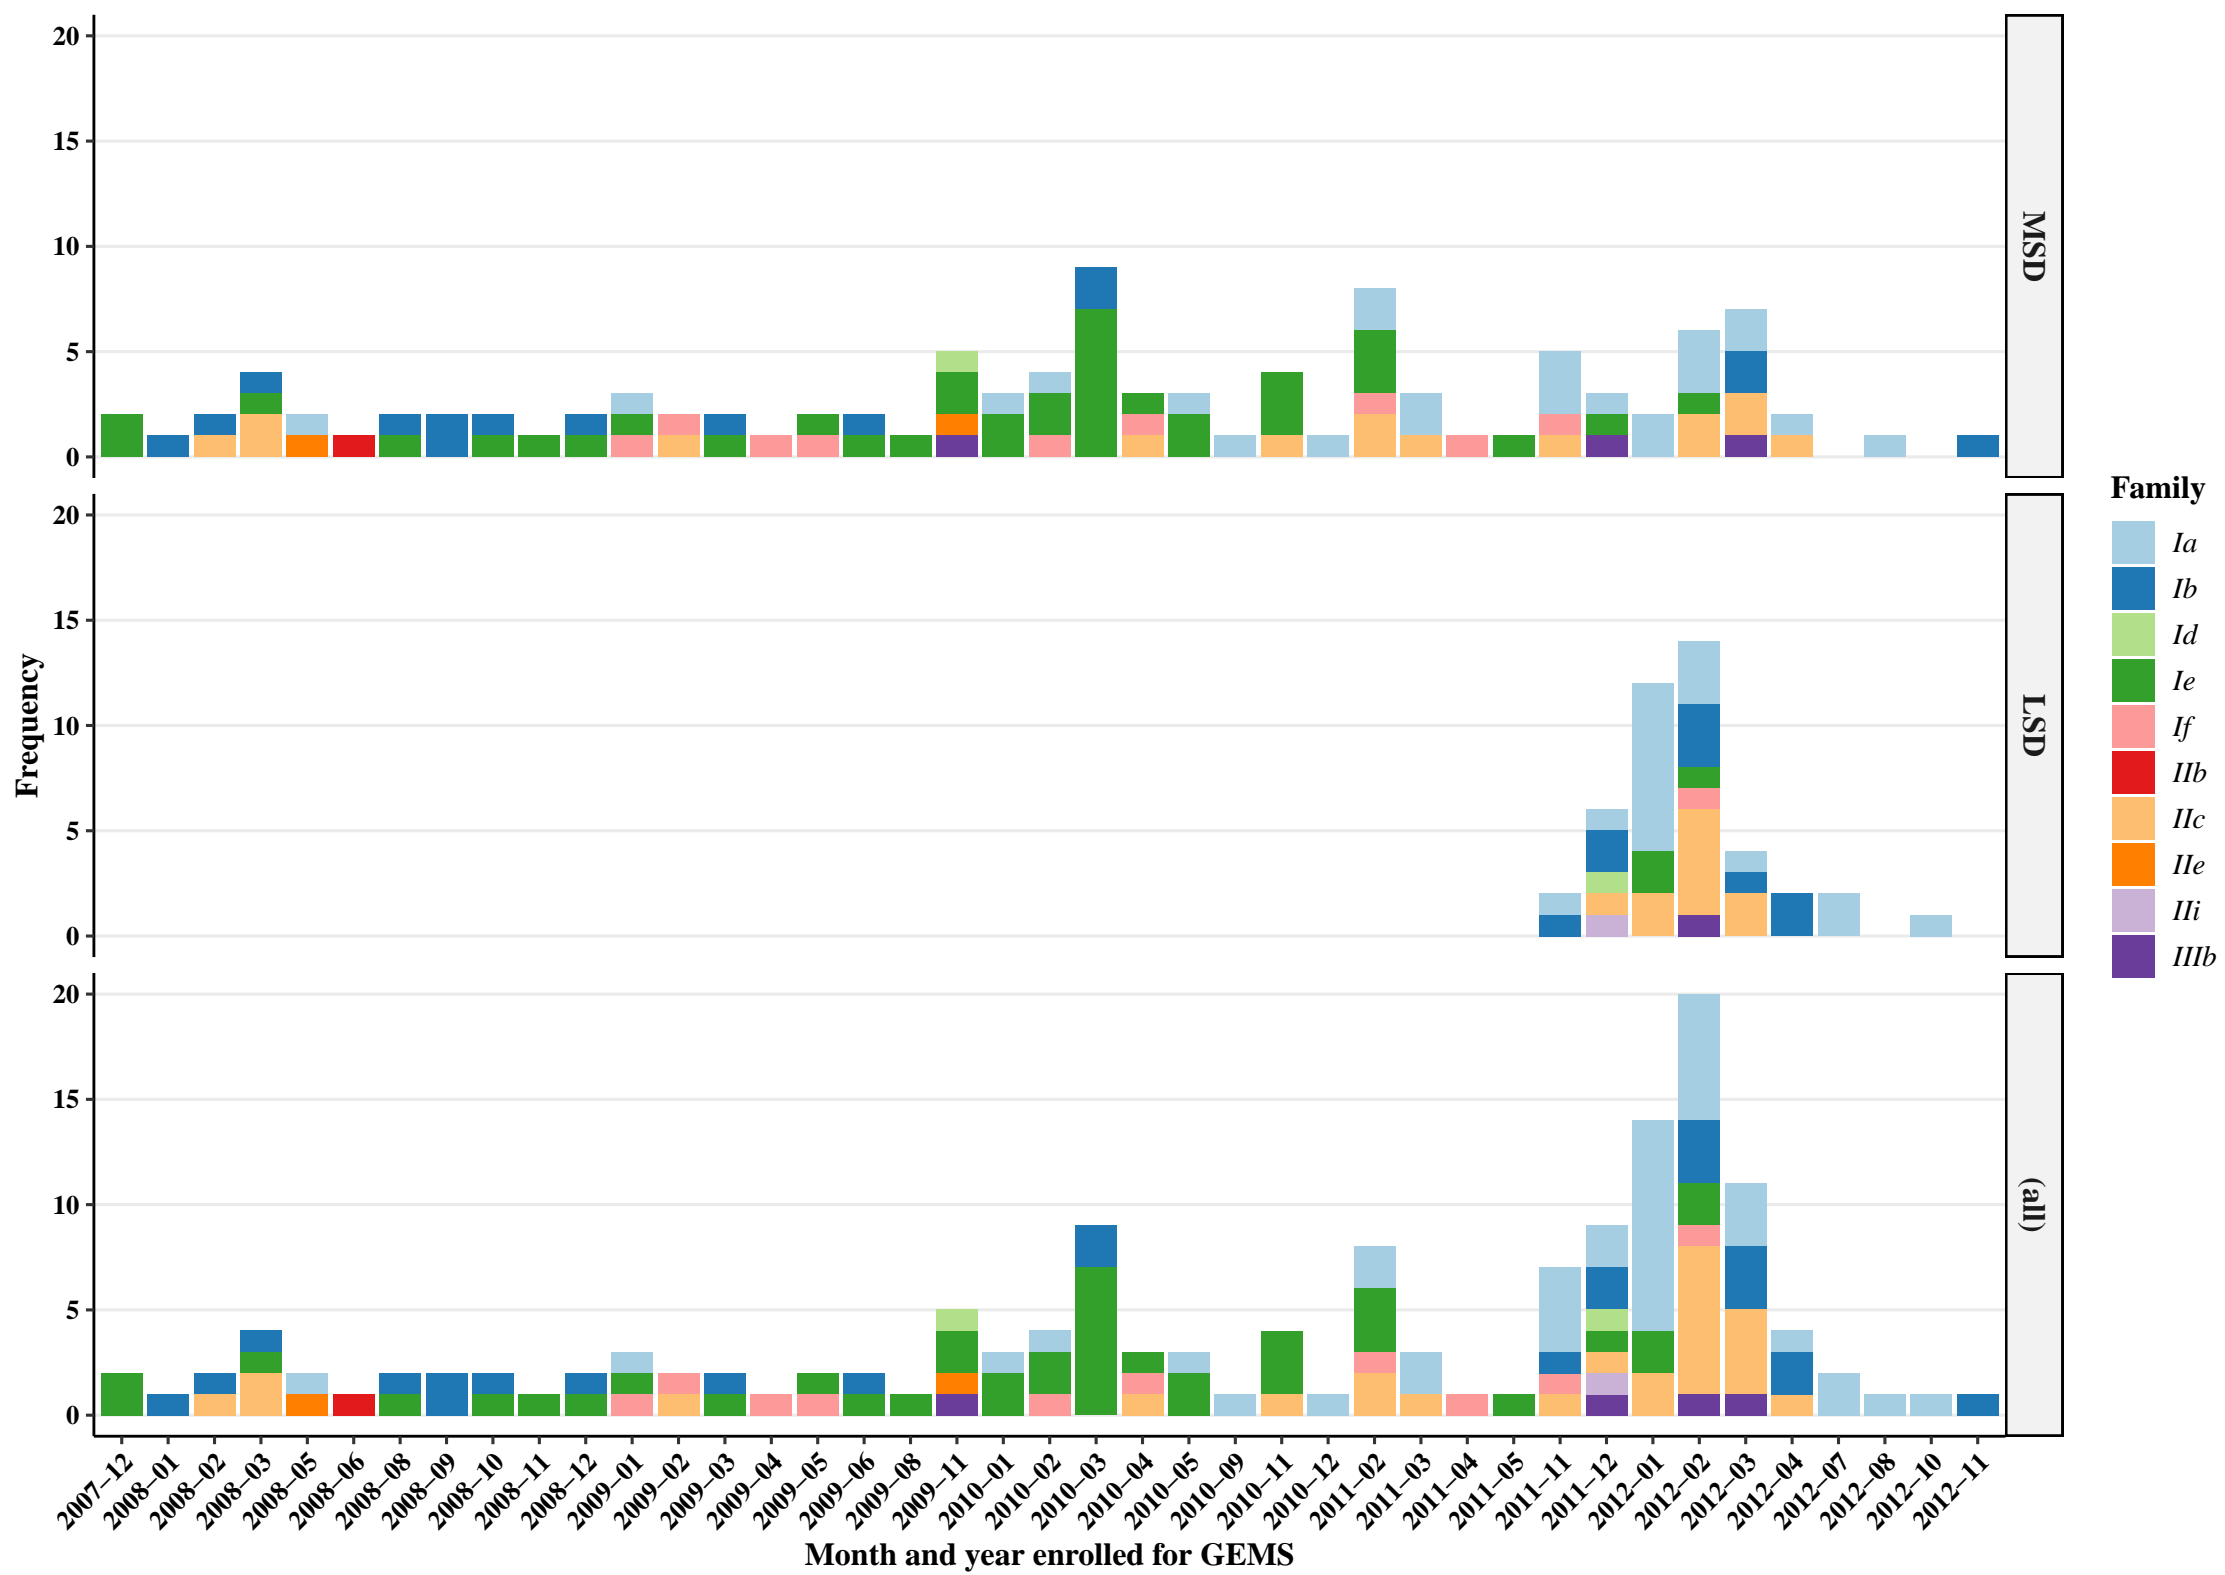

Supplement: s1 [file s1]
